# Supplementary material for: A clinically applicable and scalable method to regenerate T-cells from iPSCs for off-the-shelf T-cell immunotherapy
Source: PubMed Central journal article supplement (PMC7814014; doi:10.1038/s41467-020-20658-3), 2021-01-18
Supplement: 41467_2020_20658_MOESM1_ESM.pdf [file 41467_2020_20658_MOESM1_ESM.pdf]

## **SUPPLEMENTARY INFORMATION**

**A clinically applicable and scalable method to regenerate T-cell from iPSCs for off-the-shelf T-cell immunotherapy**

**Shoichi Iriguchi et al.**

**Supplementary Figures 1 – 10**

**Supplementary Table 1**

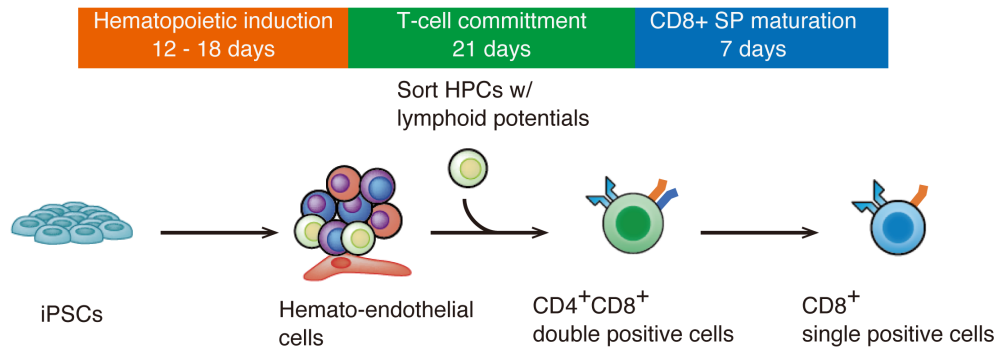

**Supplementary Figure 1. Experimental scheme.** iPSCs were induced to differentiate first into CD34<sup>+</sup>CD43<sup>+</sup> HPCs for 12–14 days by EB formation. The resulting HPCs were FACS-sorted on DL4-coated culture plates for an additional 21 days to generate CD4<sup>+</sup>CD8<sup>+</sup> DP-cells. DL4 cells were subsequently maturation cultured in the presence of anti-CD3 antibody for 7 days to induce the generation of CD4<sup>-</sup>CD8 $\alpha\beta$ <sup>+</sup> single positive T-cells (iCD8 $\alpha\beta$  T-cells). iCD8 $\alpha\beta$  T-cells were proliferated by CD3 stimulations, and assayed *in vitro* or *in vivo* for their TCR-dependent activities

Supplementary Figure 2

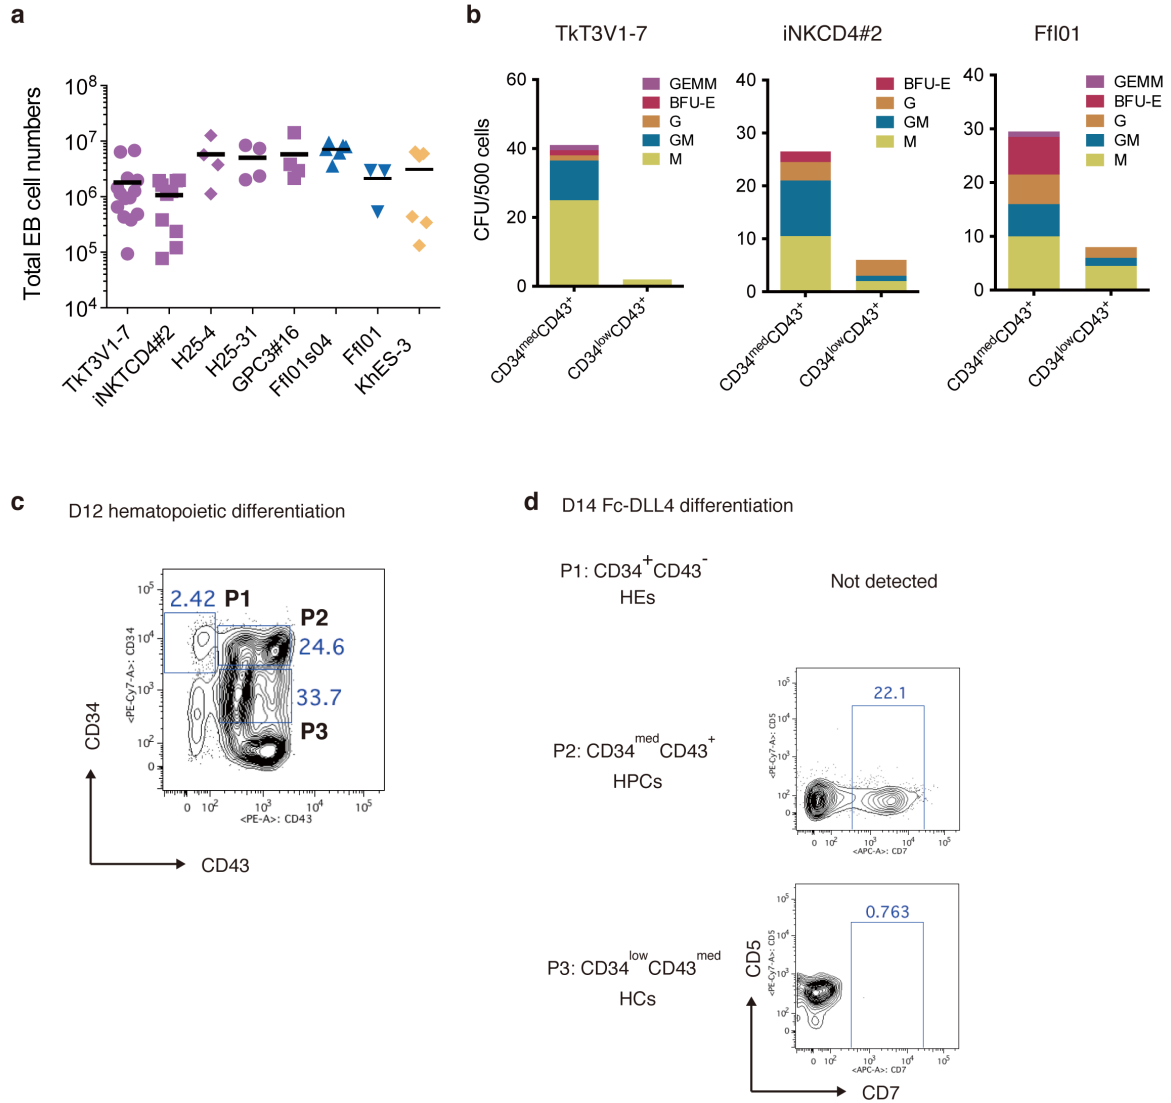

**Supplementary Figure 2. Characterization of EB-derived iPSCs.** (a) Total EB cells derived from multiple human ES/iPSC clones 12–18 days after hematopoietic induction. Dots in purple, blue, and yellow represent iPSC clones derived from T-cells, non-T-cells (proliferated PBMCs), and a human ESC line, respectively. (b) Hematopoietic colony-forming potential of the different EB subpopulations.  $n = 2$ , representative data of independent experiments is shown. (c and d) T-cell potential of the different EB subpopulations derived from Tkt3V1-7 clone measured by the presence of CD7<sup>+</sup> cells under Ff culture condition. (c) Representative flow diagram showing gating strategy of EB cell fractionations 11 days after differentiation. P1, CD34<sup>+</sup>CD43<sup>-</sup>; P2, CD34<sup>+</sup>CD43<sup>+</sup> HPCs; P3, CD34<sup>-</sup>CD43<sup>+</sup>. (d) Representative flow diagrams of the frequency of CD5 and CD7 14 days after T-cell differentiation. Plots in c and d are representative of three independent experiments.

Supplementary Figure 3

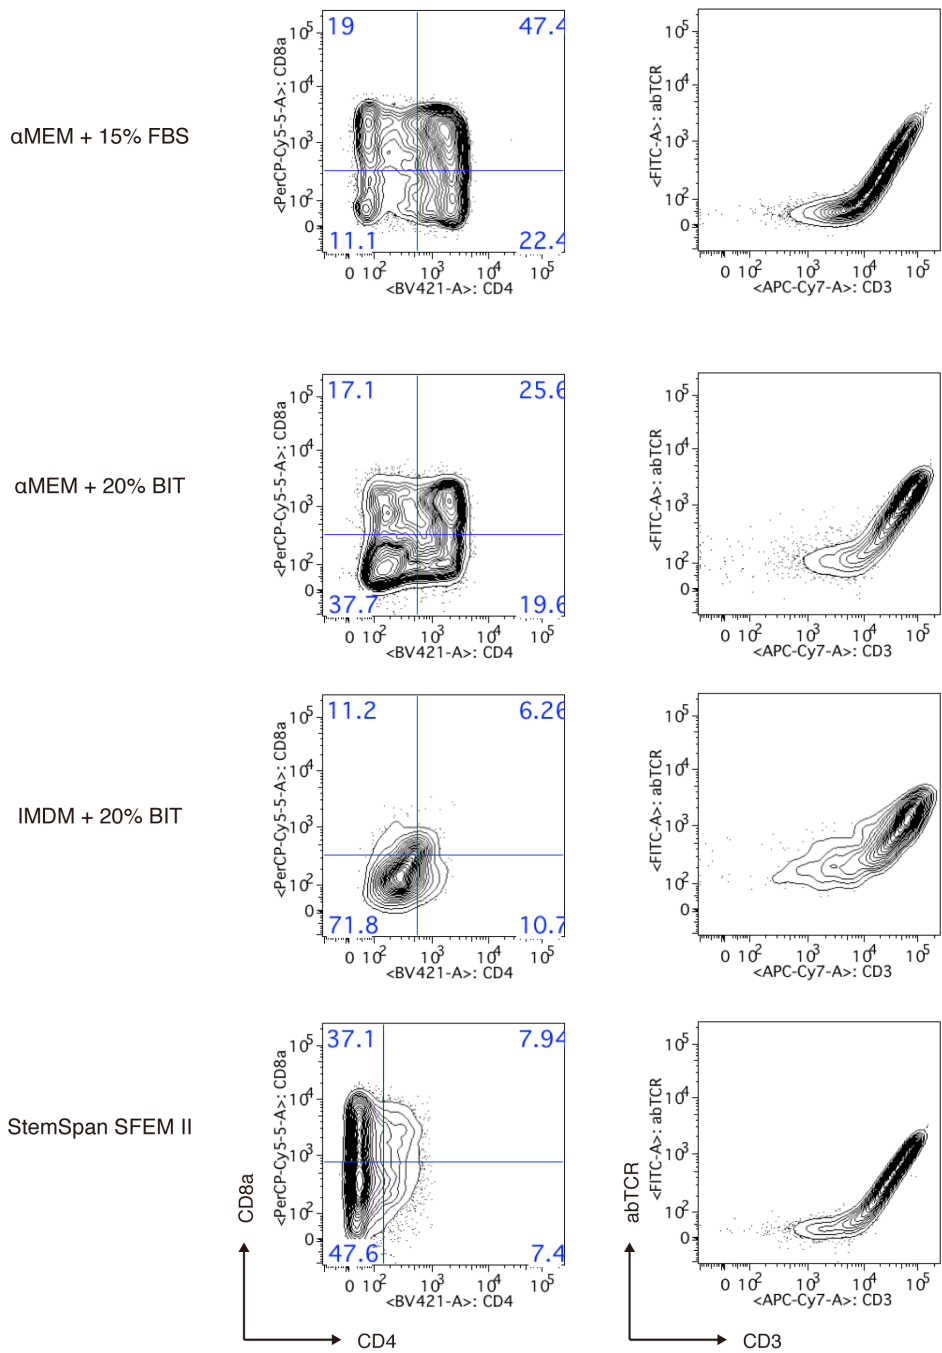

**Supplementary Figure 3. Differentiation of T-cell from iHPCs in serum-free conditions**

Representative flow cytometry plots of T-cell differentiation on DL4 and RN cultures in the presence of SDF1 $\alpha$  and SB203580 for 21 days in different serum-free medium. TkT3V1-7-T-iPSC-derived iHPCs were used as input cells.

**a Day 18 Flowdiagrams**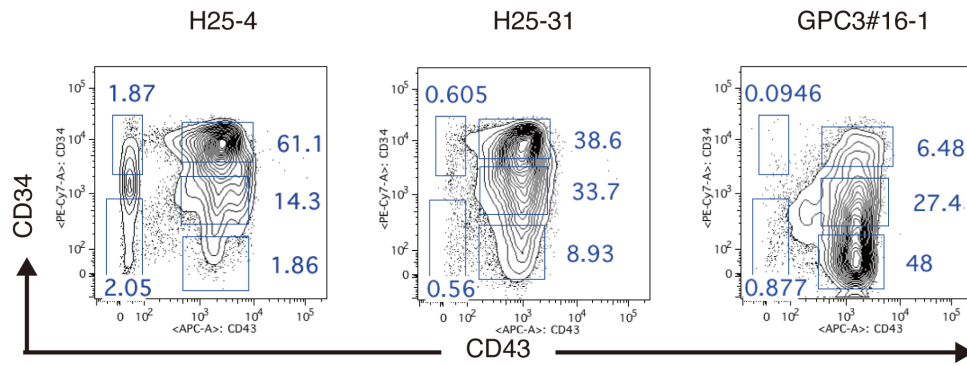**b EB cell numbers**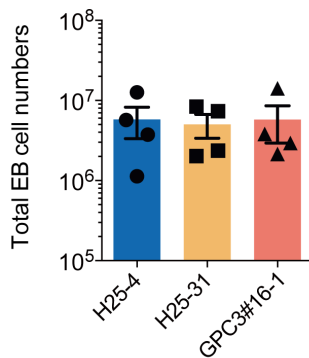**c**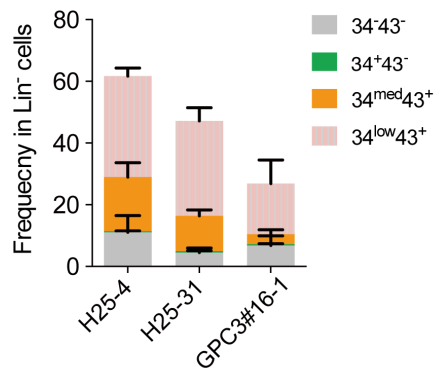**d HPC yield per iPSC**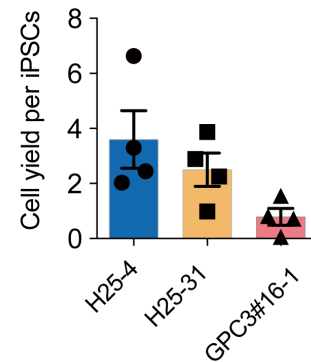**Supplementary Figure 4. Production of DP-cells from antigen-specific T-iPSC clones**

**by Ff cultures.** (a) Representative flow diagrams of the frequency of CD34 and CD43 subpopulations derived from 3 T-iPSC clones 18 days after hematopoietic differentiation. (b) Total EB cells derived from T-iPSCs 18 days after differentiation. ( $n = 4$  independent experiments) (c) Frequency of EB cell subpopulations defined by CD34 and CD43 expression ( $n = 4$  independent experiments) (d) HPC yields generated from each T-iPSC

clone collected 18 days after differentiation. ( $n = 4$  independent experiments). Data represent mean  $\pm$  SEM of  $n$  independent experiments.



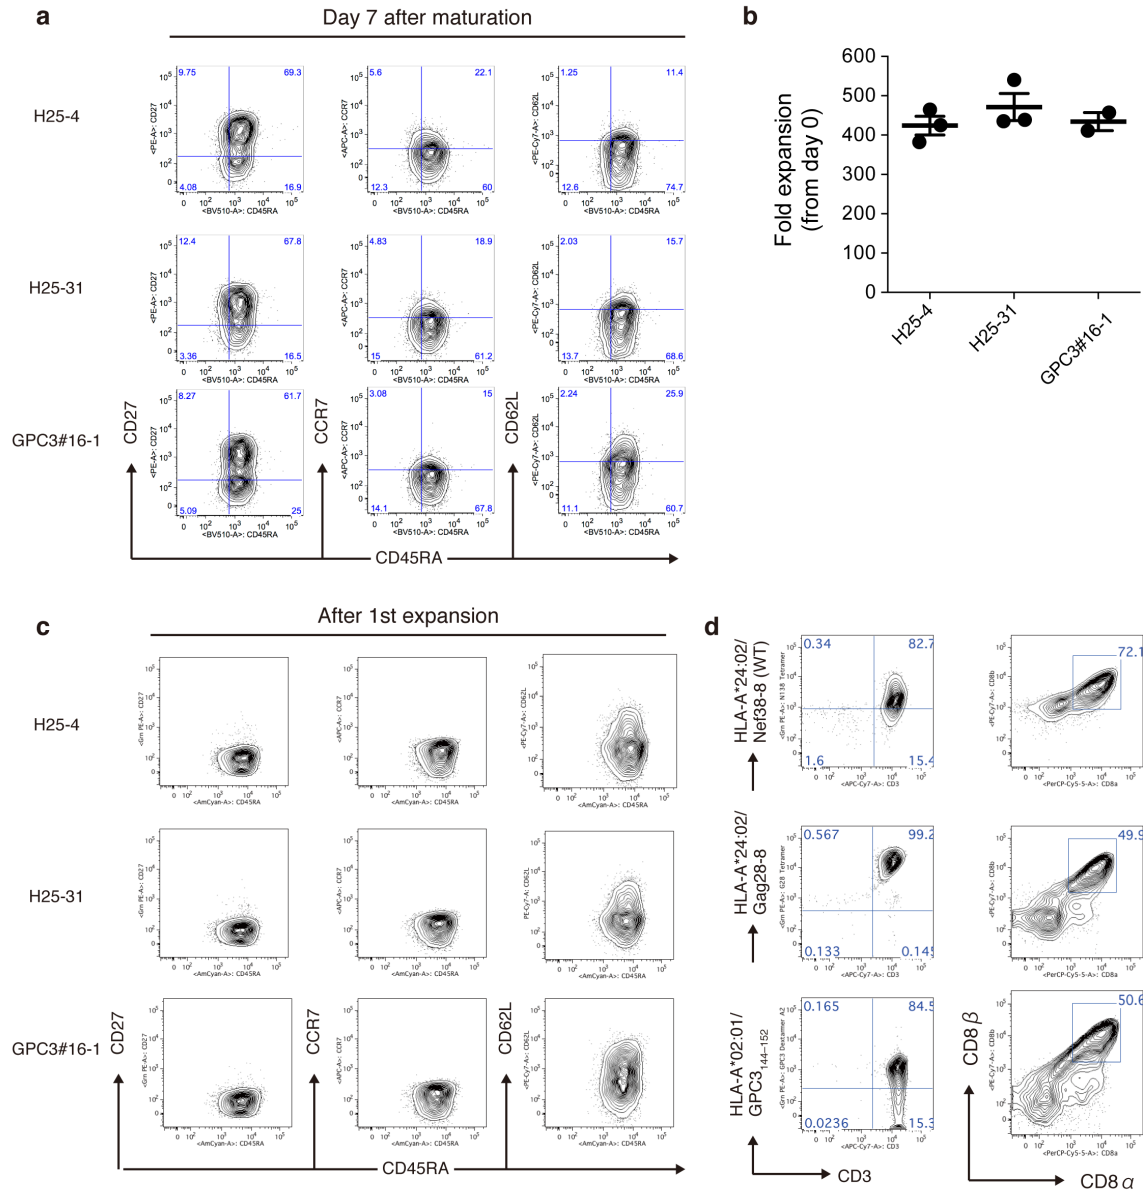

**Supplementary Figure 5. Phenotypes of proliferated iCD8 $\alpha$  $\beta$  T-cells derived from antigen-specific T-iPSCs. (a) Representative flow cytometry plots obtained 42 days after differentiation (after 7 days in maturation culture as shown in Fig.3c) showing**

naive/memory T-cell markers, CD45RA, CD27, CCR7, and CD62L of regenerated T-cells ( $n = 3$  independent experiments) **(b)** Fold proliferation of tetramer<sup>+</sup> CD8 $\alpha$  $\beta$ <sup>+</sup> SP T-cells 14 days after PHA-P/PBMC stimulation in the presence of IL-7 and IL-15. Data represent mean  $\pm$  SEM of three independent differentiation experiments—except for GPC3#16-1, where two independent differentiation experiments were performed. **(c)** Representative flow cytometry plots obtained 14 days after 1<sup>st</sup> proliferation showing expression levels of naive/memory T-cell markers, CD45RA, CD27, CCR7, and CD62L. ( $n = 3$  independent experiments) **(d)** Flow cytometry plots of proliferated CD8 $\alpha$  $\beta$ <sup>+</sup> SP T-cells showing the expression levels of tetramer and CD3 (Left), and CD8 $\beta$  and CD8 $\alpha$  (Right) ( $n = 3$  independent experiments).

Supplementary Figure 6

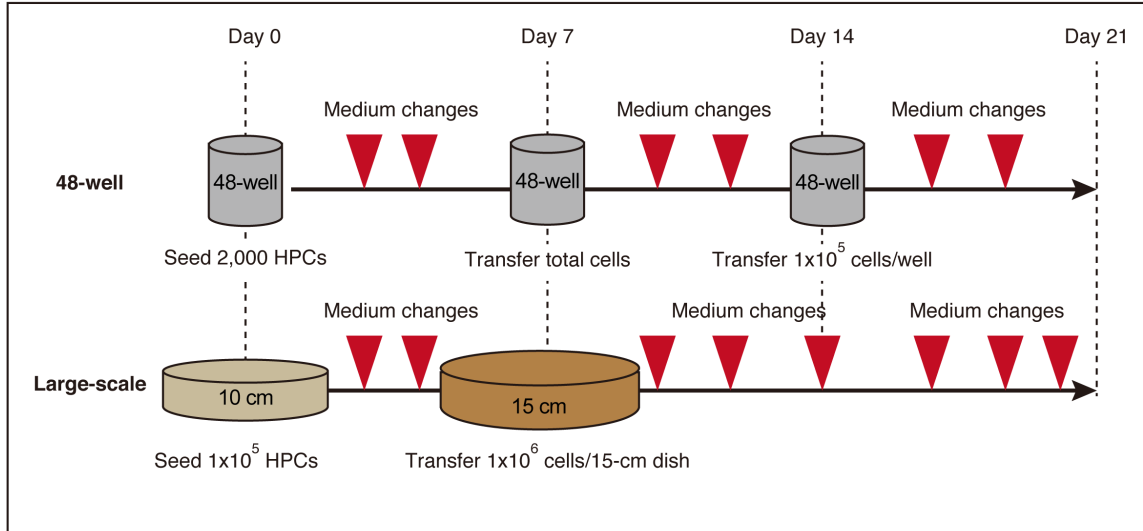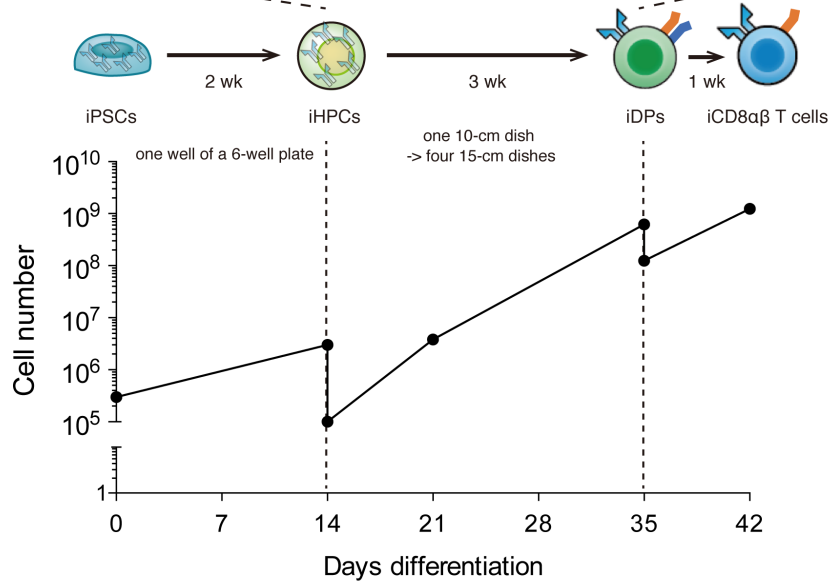

**Supplementary Figure 6 (Top)** Experimental scheme of Ff T-cell differentiation in small-scale and large-scale cultures. A total of 2000 FACS-sorted CD34<sup>+</sup>CD43<sup>+</sup> HPCs were seeded on DL4-coated plate prepared the preceding day and cultured for 7 days with medium being changed every other day. At day 7 and 14, differentiating cells were harvested and seeded on new DL4-coated plates and cultured till day 21. For large-scale cultures, 1×10<sup>5</sup> FACS-sorted HPCs were seeded on a 10-cm dish pre-coated with DL4 at 4 °C overnight. The medium was completely changed on days 2, 4, 9, 11, 14, 16, 18, 19, and 20. Differentiating cells were harvested and 1 million cells were seeded on a 15-cm dish pre-coated with DL4. Cells were not transferred thereafter. See Methods for more details. **(Bottom)** An example of cell count transition during generation of iCD8αβ T-cells from iPSC starting from one well of a 6-well plate for hematopoietic induction by EB formation. At the end of differentiation culture, we expect to obtain approximately 1.25×10<sup>9</sup> mature iCD8αβ T-cells in culture vessels.

Supplementary Figure 7

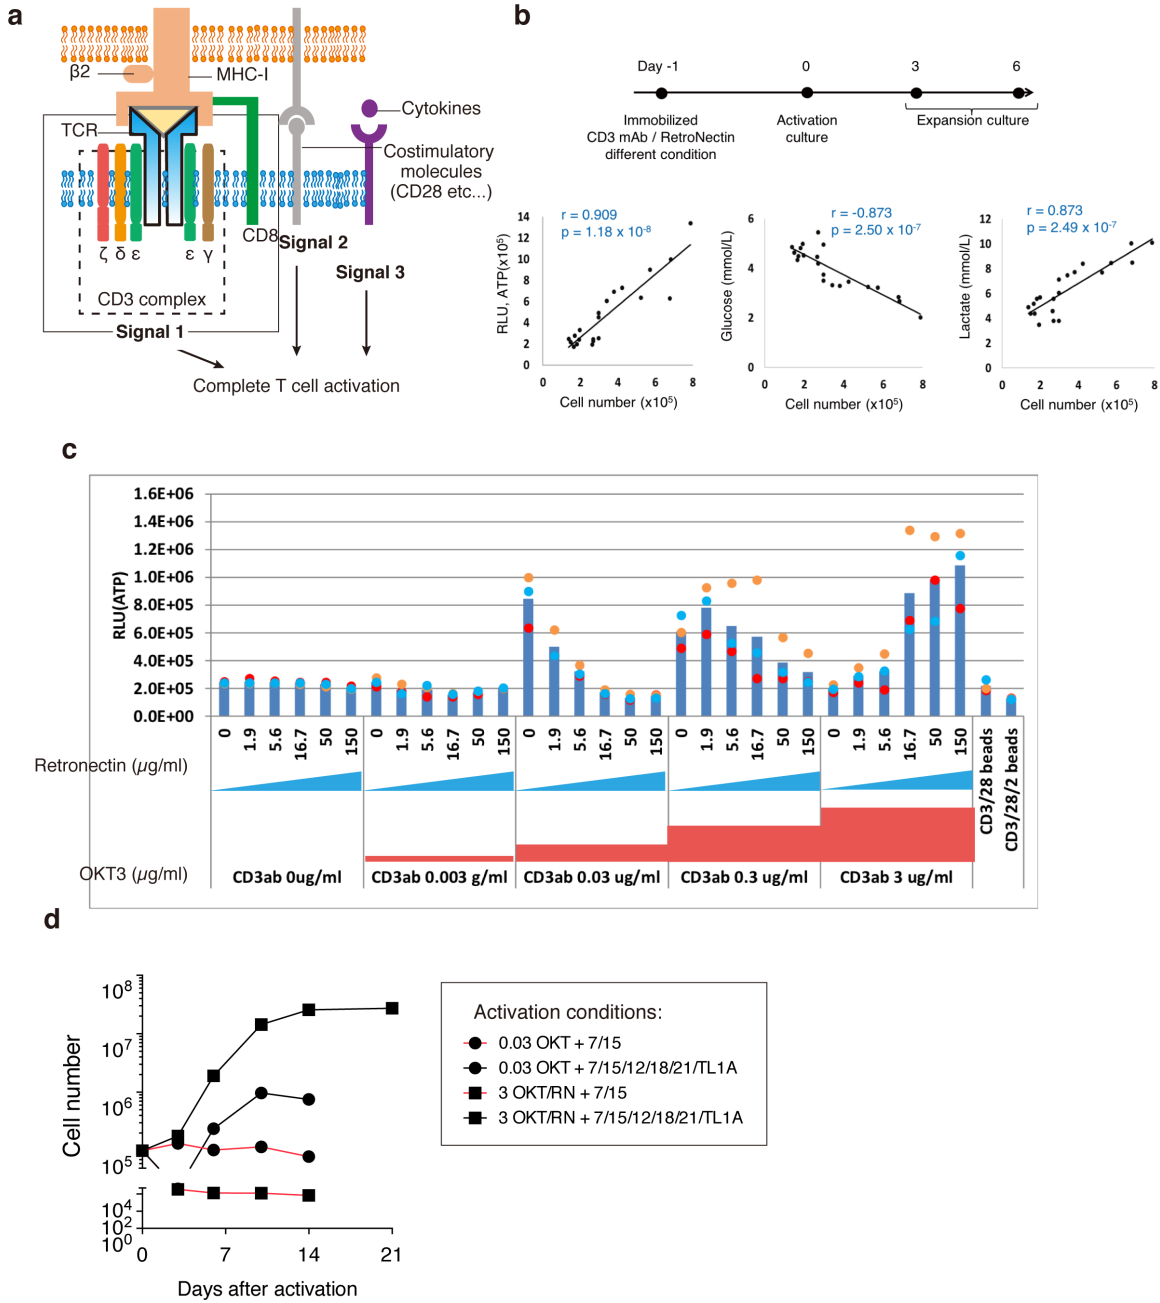

### **Supplementary Figure 7. Optimization of iCD8 $\alpha\beta$ T-cell proliferation culture**

**conditions.** (a) A schematic diagram illustrating the components of TCR/CD3 signal complex (Signal 1), costimulatory molecules such as CD28 (Signal 2), and cytokine signaling (Signal 3) involved in the complete T-cell activation. (b) Assessment of surrogate markers for T-cell proliferation for identification of the optimum concentrations of CD3, mAb and retronectin (RN). ATP, glucose, and lactate concentrations were compared to cell count 3 days after stimulation (at the end of activation culture). ATP concentration was chosen as a surrogate marker for this purpose. ( $n = 2$  independent experiments) (two-sided Student's t-tests) (c) ATP concentrations 12 days after stimulation with varying OKT3 and RN concentrations. Data represent mean  $\pm$  SEM ( $n = 1$  independent experiment) (d) Growth curve of iCD8 $\alpha\beta$  cells after stimulation with different OKT3 and RN concentrations in the presence or absence of the separately identified combination of cytokines (IL-12, -18, -21, and TL-1A). ( $n = 2$  independent experiments)

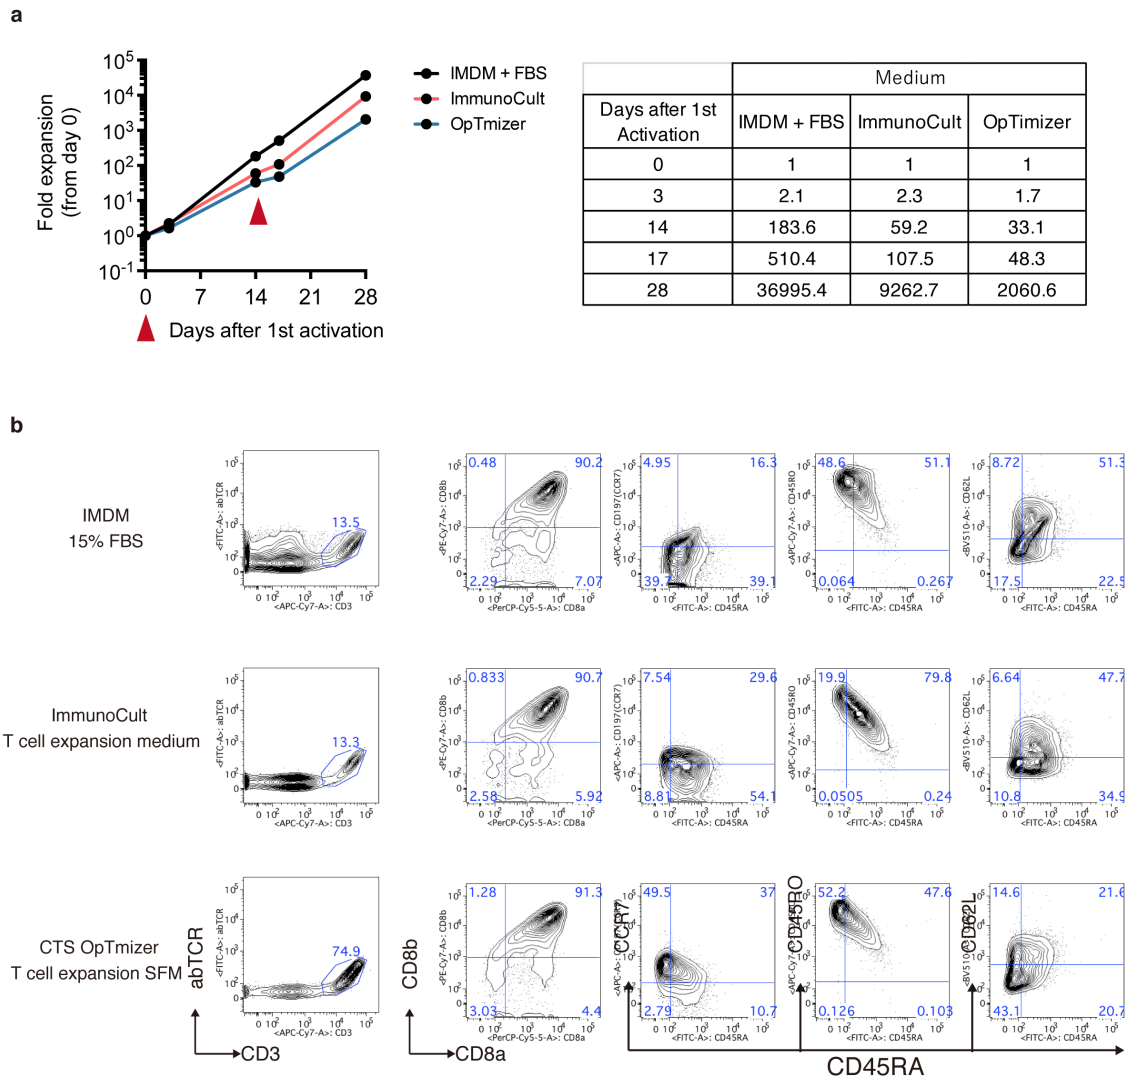

**Supplementary Figure 8. Proliferation of WT1-TCR-transduced HLA-homo iCD8 $\alpha$  $\beta$**

**T-cells in serum-free conditions.** (a) Fold proliferation of WT1-TCR iCD8 $\alpha$  $\beta$  T-cells in an optimized protocol as shown Figure 5 for two sequential rounds of stimulations in the indicated medium. (b) Flow cytometry plots of proliferated WT1-iPSC CD8 SP T-cells in

the indicated medium representing the expression levels of CD3,  $\alpha\beta$ TCR, CD8 $\alpha$ , CD8 $\beta$  and naive/memory T-cell markers.



Supplementary Figure 9

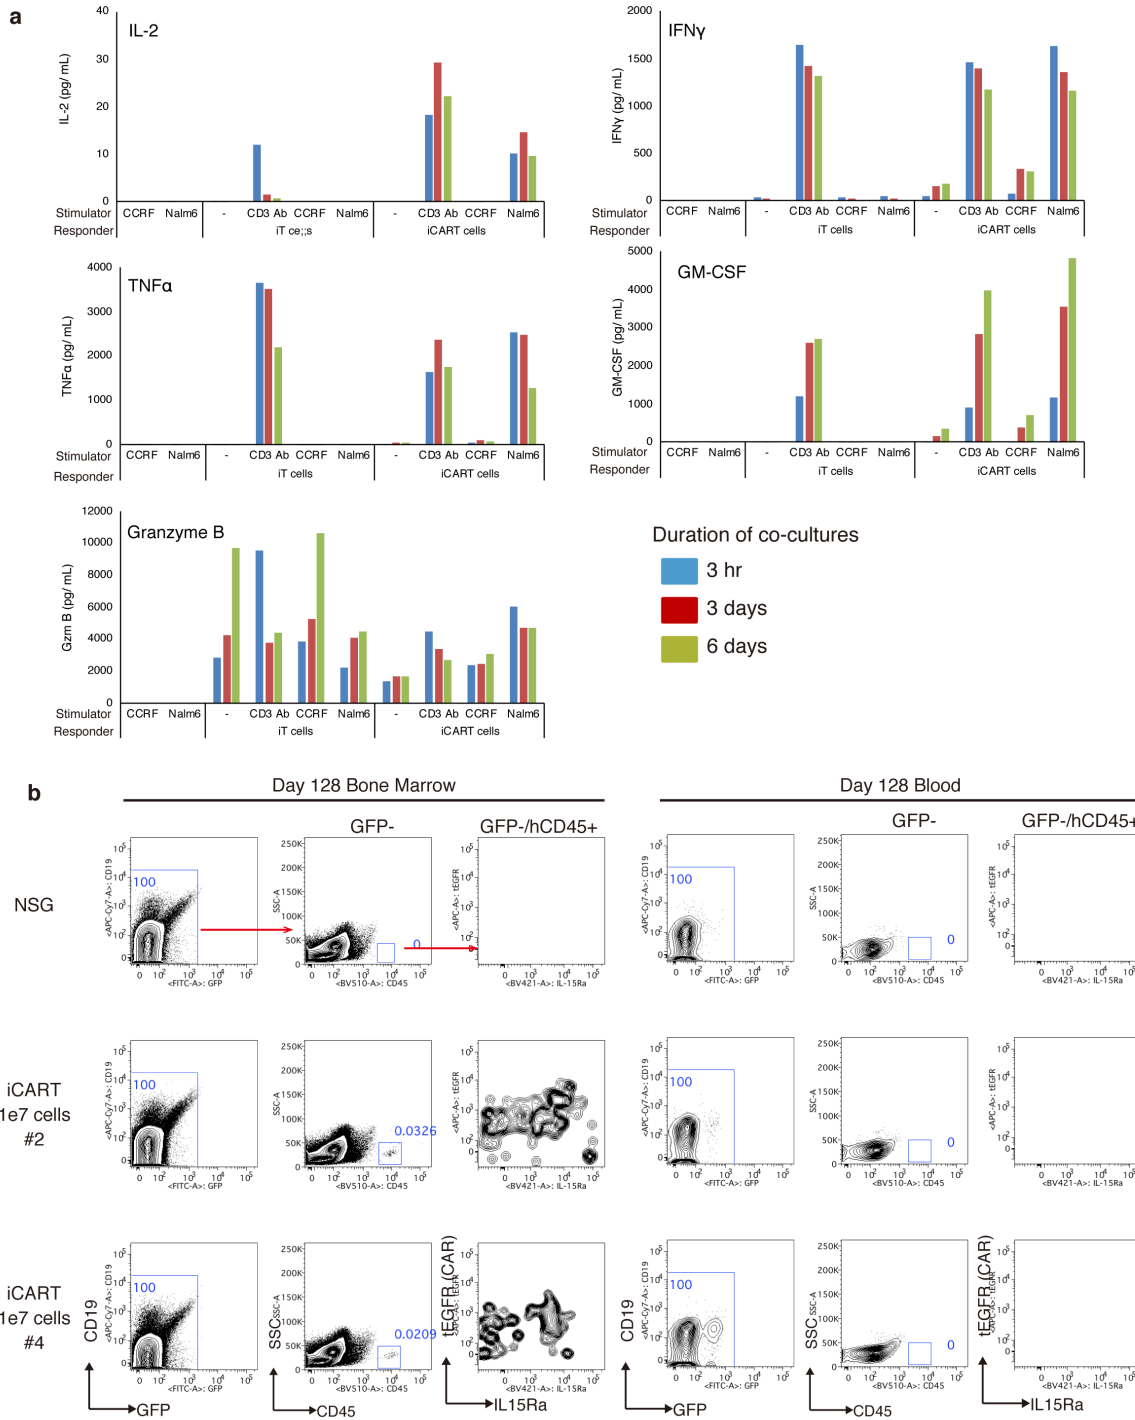

**Supplementary Figure 9. *In vitro* and *in vivo* functions of iCART cell.** (a) CD19-dependent cytokine production of iT cells and iCART cells. Concentrations of IL-2, IFN $\gamma$ , TNF, GM-CSF, and granzyme B in the culture supernatants collected at the indicated days from the cocultures. (b) NALM-6-bearing mice were treated with  $1 \times 10^7$  iCART cells. At 128 after treatment, the relapse-free mice were euthanized and bone marrow cells and blood cells were collected. Presence of iT cell or iCART cells (GFP $^-$ CD19 $^-$ humanCD45 $^+$ ) and NALM-6 (GFP $^+$ CD19 $^+$ ) cells were analyzed by flow cytometry. Expression levels of CAR and IL-15R $\alpha$  in the human CD45 $^+$  cells are also shown (Right).

Supplementary Figure 10

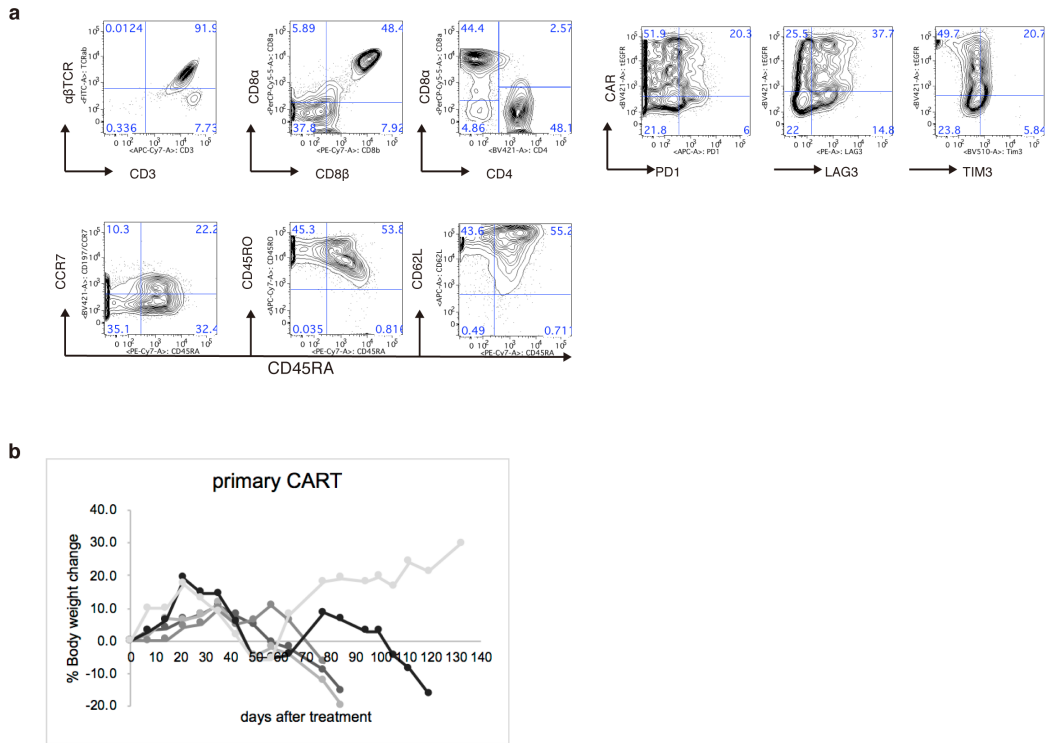

**Supplementary Figure 10. Generation and assessment of 19BBz from primary T cells.**

(a) Representative flow cytometry plots of 19BBz-transduced primary T cells (pCART cells) showing expression levels of CD3,  $\alpha\beta$ TCR, CD8 $\alpha$ , CD8 $\beta$  (Top left), naive/memory T-cell markers (Bottom left) and exhaustion markers (Right). (b) Percentage of body weight changes of mice treated with primary CART cells over time. Each line represents one recipient. Mice exhibited more than 20% weight loss were euthanized in this study.

**Supplementary Table 1.** The list of TaqMan assay IDs used in this study.

| <b>GENE Symbol</b> | <b>Assay ID</b> |
|--------------------|-----------------|
| <b>TCF3</b>        | Hs00413032_m1   |
| <b>GATA3</b>       | Hs00231122_m1   |
| <b>BCL11B</b>      | Hs01102259_m1   |
| <b>TCF7</b>        | Hs00175273_m1   |
| <b>NOTCH1</b>      | Hs01062014_m1   |
| <b>HES1</b>        | Hs00172878_m1   |
| <b>DELTEX</b>      | Hs01092201_m1   |
| <b>SPI1</b>        | Hs02786711_m1   |
| <b>ACTB</b>        | Hs01060665_g1   |
